# Supplementary material for: Hybrid Neuromuscular Training Improves Cardiometabolic Health and Alters Redox Status in Inactive Overweight and Obese Women: A Randomized Controlled Trial
Source: MDPI journal article supplement (doi:10.3390/antiox10101601), 2021-10-12
Supplement: s1 [file s1]

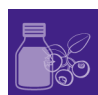

## Article

# Hybrid Neuromuscular Training Improves Cardiometabolic Health and Alters Redox Status in Inactive Overweight and Obese Women: A Randomized Controlled Trial

## Supplementary Materials

Table S1. The exercises of the training protocol.

| Adjunct Modalities              | Phase 1                  | Phase 2                     | Exercises<br>Phase 3       |
|---------------------------------|--------------------------|-----------------------------|----------------------------|
| 1 – Balance Ball                | Over dome ankle touch    | Straddle jump               | Split jack                 |
| 2 – Suspension Exercise Device  | Neutral grip row         | Wide grip row               | Y deltoid raise            |
| 3 – Kettlebell                  | Sumo deadlift            | Sumo deadlift high pull     | Two-arm swing              |
| 4 – Bodyweight                  | Straight-arm plank       | Forearm plank               | Straight-arm reverse plank |
| 5 – Speed Ladder                | Low knee skip            | Lateral shuffle             | Heel flick                 |
| 6 – Battling Rope               | Bilateral wave           | Alternating wave            | Side-to-side wave          |
| 7 – Medicine Ball               | Alternating static lunge | Forward lunge with press    | Lunge to chest pass        |
| 8 – Foam Roller                 | Forearm plank            | Forearm plank with leg lift | Shifting Plank             |
| 9 – Bodyweight                  | Jumping jack             | Split jack                  | Ice skater                 |
| 10 – Resistance Band with Stick | Squat to overhead press  | Lateral shuffle press       | Hockey slap shot           |
| 11 – Resistance Band            |                          | Squat row                   | Reverse fly with lunge     |
| 12 – Medicine Ball              |                          |                             | Squat throw                |

Table S2. The characteristics of the training protocol.

| Training Parameters              | Phase 1<br>(Weeks 1-7) | Phase 2<br>(Weeks 8-14) | Phase 3<br>(Weeks 15-20) |
|----------------------------------|------------------------|-------------------------|--------------------------|
| Session duration (min)           | 23.0                   | 38.0                    | 41.0                     |
| Effort time (min) <sup>a</sup>   | 6.66                   | 16.5                    | 24.0                     |
| Recovery time (min) <sup>b</sup> | 16.34                  | 21.5                    | 17.0                     |
| Work-to-rest ratio               | 1:2                    | 1:1                     | 2:1                      |
| Work interval (sec)              | 20.0                   | 30.0                    | 40.0                     |
| Rest interval (sec)              | 40.0                   | 30.0                    | 20.0                     |
| Exercises amount                 | 10                     | 11                      | 12                       |
| Rounds                           | 2                      | 3                       | 3                        |
| Rest time/round (min)            | 3.0                    | 2.5                     | 2.5                      |
| Movement number <sup>c</sup>     | As many as possible    | As many as possible     | As many as possible      |

<sup>a</sup> Effort time = session duration – recovery time.<sup>b</sup> Recovery time = session duration – effort time.<sup>c</sup> Maximal number of movements during efforts time.
